# Supplementary material for: ATTITUDES TO AGEING AND TO GERIATRIC MEDICINE
Source: MDPI journal article supplement (doi:10.3390/foods10081843), 2014-01-01
Supplement: s1 [file s1]

## Supplementary material

**Table S 1** Graphical and numerical optimization of composite flour

|                        | Graphical optimization | Numerical optimization |
|------------------------|------------------------|------------------------|
| Proteins(g/100gDM)     | 15,1969                | 15,1971                |
| Lipids(g/100gDM)       | 6,83004                | 6,83052                |
| Carbohydrats(g/100gDM) | 64,5233                | 64,5229                |
| Fe(ppm)                | 57,6145                | 57,6143                |
| Zn(ppm)                | 45,4751                | 45,4758                |
| P(ppm)                 | 4575,32                | 4418,82                |
| Polyphenols(µgGAE/gDM) | 563,016                | 563,012                |
| Scavenging activity(%) | 17,0955                | 17,0957                |
| Yellow index           | 19,6008                | 19,6                   |
| Zeleny number(ml)      | 10,0983                | 10,0783                |

Design-Expert® Software  
Component Coding: Actual

Desirability  
0 1

X1 = A: Soft wheat flour  
X2 = B: chickpea flour  
X3 = C: milk powder

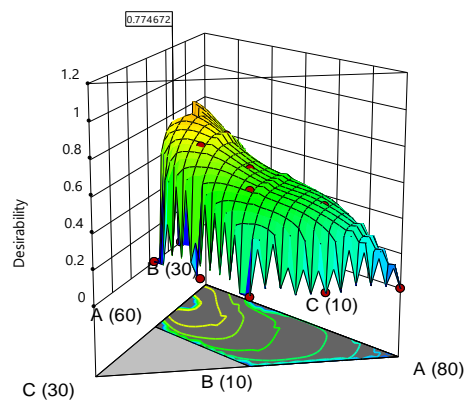

**Figure S1:** Response surface mixture optimization of composite flour

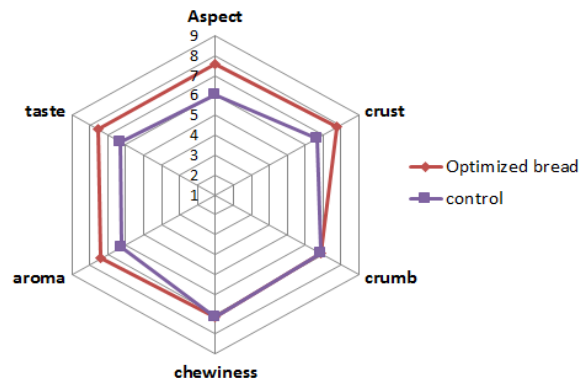

**Figure S2:** Average acceptance for optimized and control breads

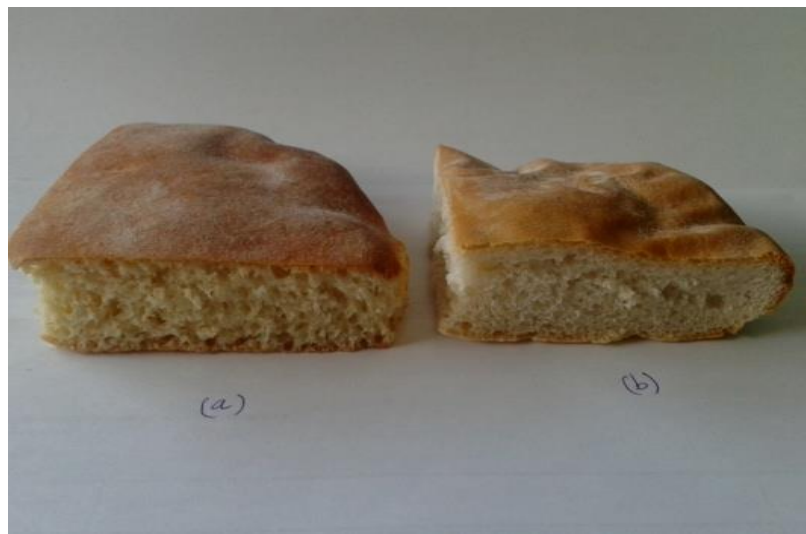

**Photo S1:** Formulated breads: from left a)-optimized bread, b)-bread wheat bread (control)
